# Supplementary material
Source: PubMed Central journal article supplement (PMC2678603)
Supplement: 0902859106_0902859106SI.pdf [file 0902859106_0902859106SI.pdf]

# Supporting Information

Watanabe et al. 10.1073/pnas.0902859106

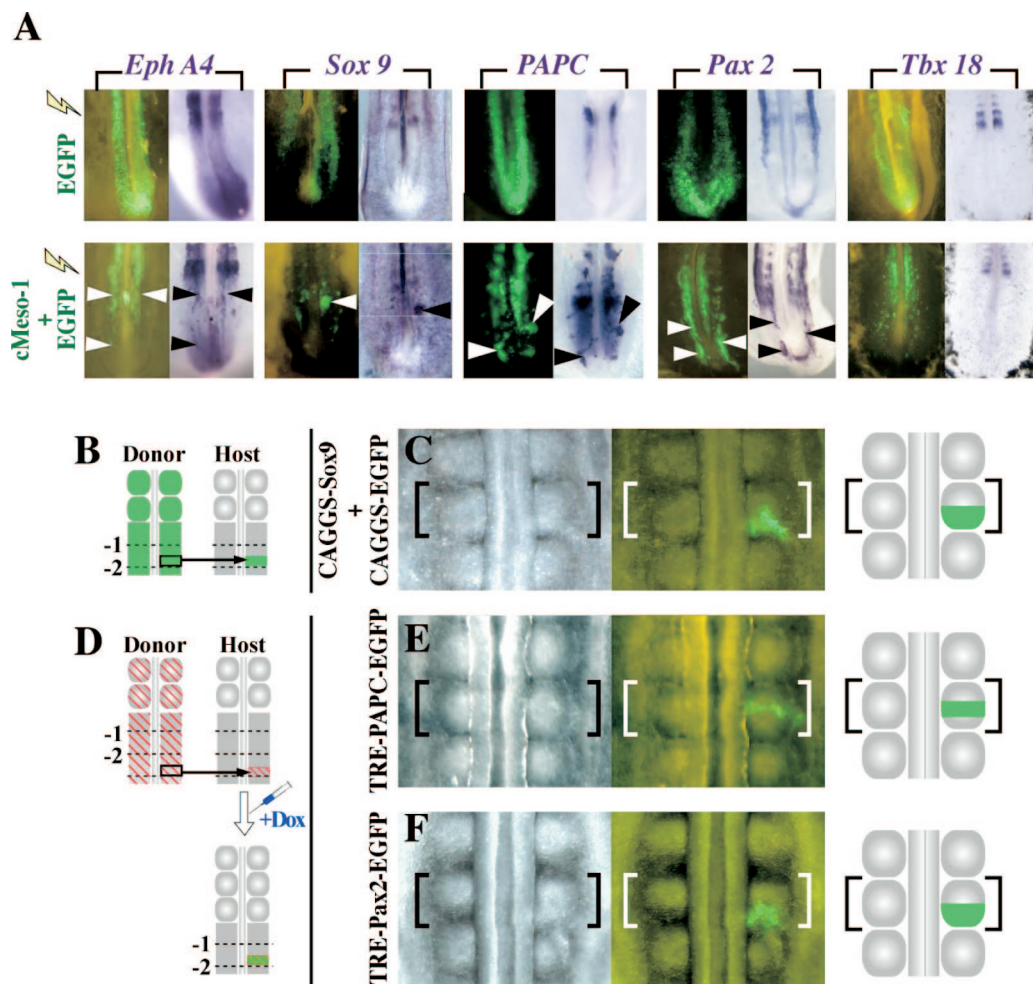

**Fig. S1.** Downstream effectors of cMeso1 during intersomitic gap formation. Whereas expression of Sox9, PAXC, and Pax2 was up-regulated in PSM by cMeso1, these genes failed to induce a formation of ectopic boundary when subjected to a gap-inducing assay. (A) E2 embryos that had been electroporated with cMeso1 were subjected to whole mount *in situ* hybridization using the probes indicated on the top of the panel. Embryos electroporated with EGFP were used as controls. (B-F) Gap-inducing assay shows that Sox9 (C,  $n = 10$ ), PAXC (E,  $n = 12$ ), and Pax2 (F,  $n = 9$ ) were incapable of inducing the gap formation. The tet-on method was used for PAXC and Pax2, as overexpression of these genes carried by the pCAGGS vector impeded ingress of PSM precursors.

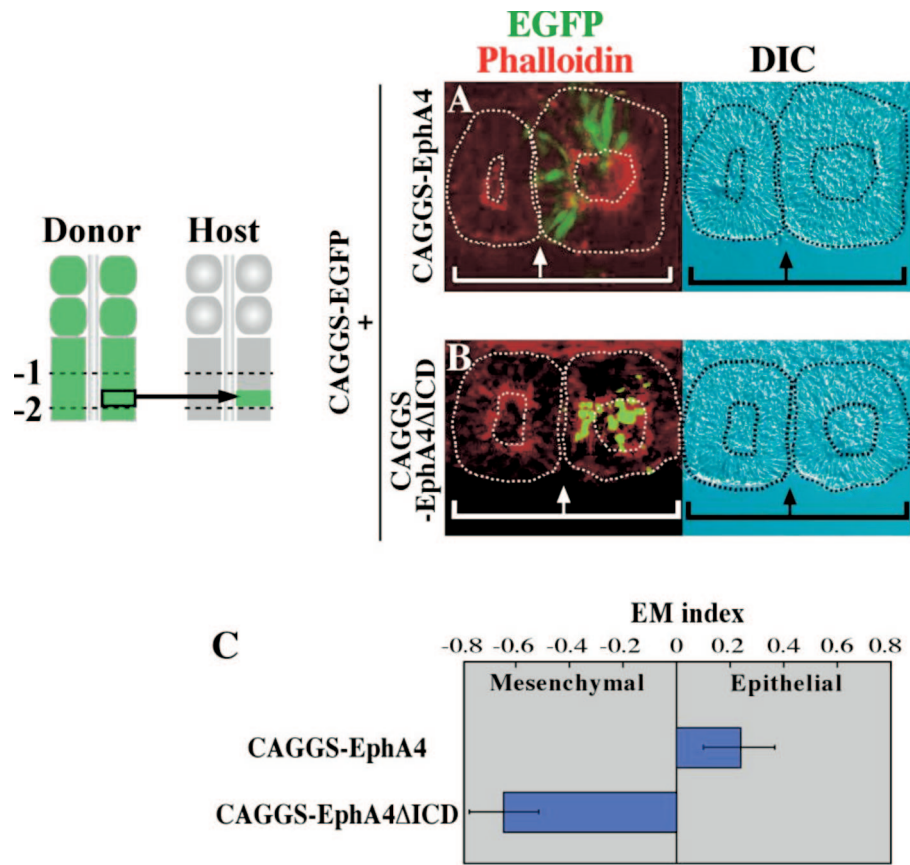

**Fig. S2.** Eph-forward signals appear to be important for the MET of posterior border cells, although these signals are dispensable for the gap induction. (A, B) Embryos were whole-mount stained with phalloidin, and confocal images of horizontal view over a 10- $\mu$ m thickness were obtained (dark field). The embryo was subsequently subjected to paraffin-sectioning to obtain the same view for Nomarski microscopy. The anterior to the left and the midline to the bottom (neural tube discarded). An arrow indicates a gap ectopically formed. (A) Most of EphA4-electroporated cells exhibited an epithelial character in a formed somite. (B) EphA4 $\Delta$ ICD-electroporated cells, although capable of inducing a gap, failed to epithelialize correctly. (C) EM-index for the somitic cells electroporated with EphA4 ( $n = 13$  somites) or EphA4 $\Delta$ ICD ( $n = 9$  somites). See also Fig. 30.

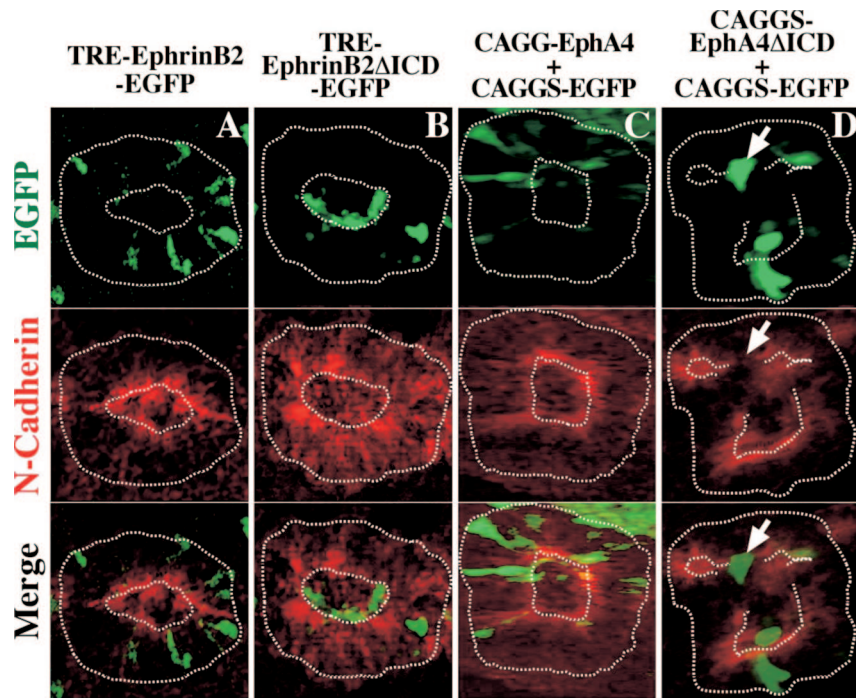

**Fig. S3.** Bidirectional activation of EphrinB2-reverse and EphA4-forward signals is important for the MET to occur during somitogenesis. Somites electroporated with the constructs shown on the top were stained for N-cadherin, an apical marker for somitic epithelium. Sagittal views with the dorsal to the top and the anterior to the left.
